# Supplementary material for: Evaluation of an Internal Review Process for Grants And Manuscripts in the Canadian Critical Care Trials Group
Source: Hindawi journal article supplement (doi:10.1155/2014/595320), 2014-01-01
Supplement: f1 [file 595320.f1.pdf]

**1. From your perspective as a REVIEWER, what is your overall impression of the CCCTG manuscript review process?**

- Poor
- Fair
- Neutral
- Good
- Excellent

**2. How strong do you believe that there was a "good fit" between your expertise/interests and the manuscripts that you reviewed?**

- Strongly Disagree
- Disagree
- Neutral
- Agree
- Strongly agree

**3. Do you believe that you had ample time to review the manuscripts that you reviewed?**

- Yes
- No
- Undecided

**4. Do you agree with the current "open review process" in which manuscript authors are aware of who is reviewing their documents?**

- Yes
- No
- Undecided

**5. Would you prefer a structured or unstructured format for reviews of manuscripts?**

- Structured
- Unstructured
- Undecided

**6. How often do you review manuscripts for various journals? Please choose the response that most closely reflects the frequency of your reviews.**

- None
- 1 - 3/year
- 4 - 8/year
- 9 - 12/year
- > 12/year

**7. Which of the following do you believe are the roles of the CCCTG manuscript reviewers? (Please check ALL that apply)**

- Word-smithing
- Document organization
- Enhancing the clarity of key messages
- Reviewing consistency of the data presented
- Improving/shaping the key scientific arguments as are typically found in the Introduction and Discussion sections of manuscripts
- Providing additional references
- Optimizing presentation of tables and figures
- Description of methodology
- Framing of the study question
- Overarching comments regarding design and/or interpretation

Other (please specify)

**8. Would you have liked to have seen your co-reviewer's review of the submitted manuscript?**

- Yes
- No
- Undecided

**9. Would you like constructive written feedback about the quality of your review from the CCCTG Grants and Manuscripts committee regarding the manuscript(s) that you reviewed?**

- Yes
- No
- Undecided

**10. Do you prefer to review ONLY manuscripts that are about topics within your areas of interest/expertise?**

- Yes
- No (any topic)
- Undecided

**11. What works well in your current manuscript review process?**

**12. What needs improvement in the current manuscript review process?**

**13. Any other suggestions?**
